# Supplementary material
Source: PubMed Central journal article supplement (PMC4410913)
Supplement: sb500252a_si_003.pdf [file sb500252a_si_003.pdf]

## Supplemental Information

### Programming controlled adhesion of *E. coli* to target surfaces, cells and tumors with synthetic adhesins.

Carlos Piñero-Lambeck<sup>1#</sup>, Gustavo Bodelón<sup>1#</sup>, Rodrigo Fernández-Periáñez<sup>2</sup>, Angel M. Cuesta<sup>2</sup>,  
Luis Álvarez-Vallina<sup>2</sup>, and Luis Ángel Fernández<sup>1\*</sup>

*(1) Department of Microbial Biotechnology, Centro Nacional de Biotecnología, Consejo Superior de Investigaciones Científicas (CSIC), Campus UAM Cantoblanco, 28049 Madrid, Spain.*

*(2) Molecular Immunology Unit, Hospital Universitario Puerta de Hierro, Majadahonda, 28222 Madrid, Spain.*

**Running title:** Programmable *E. coli* adhesion

**Keywords:** adhesins/ cell surface antigens / *E. coli* / synthetic biology / tumor targeting

Note: # These authors contribute equally to this work

---

\*Corresponding Author:

Dr. Luis Ángel Fernández

Centro Nacional de Biotecnología, CNB- CSIC

Darwin 3

Campus UAM, Cantoblanco,

Madrid 28049 (Spain).

Phone: +34 91 585 48 54

Fax: +34 91 585 45 06

E-mail: [lafdez@cnb.csic.es](mailto:lafdez@cnb.csic.es)

## Supplemental Methods

### Plasmid constructions.

pNVfib: A DNA fragment encoding a VHH binding human fibrinogen <sup>1</sup> was cloned between *SfiI* and *NotI* sites of pNeae2.

pDisplay-TirM-tm: the DNA sequence corresponding to amino acid residues 252 to 360 of the translocated intimin receptor of EHEC was amplified by PCR from pET28a-TirM<sub>EHEC</sub><sup>2</sup> template with oligonucleotide primers Sfi-TirM-For and TirM-Xma-Rev. The amplified fragment was digested with *SfiI* and *XmaI* and cloned into the same sites of pDisplay vector. Subsequently, a DNA fragment encoding mWasabi (GeneBank Accession Number EU024648) was synthesized (GeneArt, Life Technologies) with flanking *SmaI* and *SacII* restriction sites and cloned into pDisplay.

pGE: This 1436 bp Km<sup>R</sup>-suicide plasmid contains two *I-SceI* sites flanking a multiple cloning site (MCS) with the following restriction sites: *XmaI*, *XhoI*, *BsaI*, *SacI*, *NdeI*, *XbaI*, *HindIII*, *SpeI*, *AvrII*, *SphI* and *XmaI*. This plasmid was constructed ligating three DNA fragments, one encompassing the R6K origin of replication, a Km resistance cassette and the MCS. A DNA fragment of 424 bp corresponding to R6K origin of replication was PCR amplified from plasmid pEMG<sup>3</sup> with R6K1 and R6K2 primers. This PCR product has *XmaI* and *I-SceI* sites at its 5'-end and an *AscI* site at its 3'-end. The Km resistance cassette was amplified by PCR from pEMG with Km1 and Km2 primers. This PCR product of 958 bp has an *AscI* site at its 5'-end and *I-SceI* and *XmaI* sites at its 3'-end. The MCS was obtained annealing oligonucleotides MCS1 and MCS2 generating a DNA fragment of 74 bp with *XmaI* cohesive ends. PCR fragments of R6K and Km were digested with *XmaI* and *AscI*, and ligated to the MCS.

pGE*flu*: This suicide plasmid is a pGE-derivative with two homology regions (HR) of ca. 500 bp flanking the *flu* gene that were amplified by PCR from the chromosomal DNA of *E. coli* K-12 MG1655. The 5'-HR was amplified with oligos XhoI-yeep and SacI-yeep and cloned between *XhoI*-*SacI* sites of pGE. The 3'-HR was amplified with oligonucleotides Ang43-Spe and Ang43-Sph and cloned into *SpeI* and *SphI* restriction sites of pGE vector backbone.

pGE*flu*-SAgfp: The sequence encoding NVgfp fusion was obtained by digesting pNVgfp with *XbaI* and *HindIII* and cloned into same sites of pGE*flu*. Promoter P<sub>N25</sub> sequence, obtained by hybridizing oligonucleotides PN25-Sac-Xba1 and PN25-Sac-Xba2, was cloned upstream NVgfp between *SacI* and *XbaI* sites.

pGE*flu*-SATir: The sequence encoding the VHH anti-TirM and C-terminal myc-tag was obtained by digestion of pNVtir<sup>2</sup> with *NcoI* and *HindIII* and cloned into the same sites of pGE*flu*-SAgfp replacing the VHH anti-GFP and myc-tag of SAgfp.

pGE*mat-lux*: This suicide plasmid is a pGE-derivative contains the *luxCDABE* operon with P<sub>2</sub> constitutive promoter and two homology regions (HR) of ca. 500 bp flanking the *matB* gene of *E. coli* K-12 MG1655. The 5'-HR was amplified by PCR using primers matA-XhoI and matA-SacI and cloned between *XhoI* and *SacI* sites of pGE. The 3'-HR was amplified by PCR using primers matBC-SpeI and matBC-SphI and cloned into *SpeI* and *SphI* sites of pGE. The *luxCDABE* operon was obtained by *HindIII* and *SpeI* digestion of pSEVA226<sup>4</sup> and cloned into the same sites of pGE vector backbone. The P<sub>2</sub> promoter sequence was cloned between *SacI* and *HindIII* sites of pGE. The constitutive P<sub>2</sub> promoter is a synthetic tandem promoter based on P<sub>A1</sub> and Ptac<sup>5</sup> with the following sequence (5'-  
TTATCAAAAAGAGTATTGGCTTAAAGTCTAACCTATAGGATACTTAC  
AGCCATCGAGAGGGACACGGCGAATCTAGAGTCGACCTGCAGGCATGCAAGC

TCTTCTGAAATGAGCTGTTGACAATTAATCATGGGCTCGTATAATAGATTCAT-  
3')

***E. coli* strain constructions.**

EcM1SAgfp: The EcM1 strain carrying pACBSR (Cm<sup>R</sup>) was transformed with pGE*flu*-SAgfp (Km<sup>R</sup>) and cointegrants were selected on LB-Km-Cm plates. Cointegrants were resolved by I-SceI expression and individual Km sensitive colonies were checked by PCR with primer pairs: VHH-Sfi2 and VHH-Not for VHH detection; Yoe1 and NeaeR1 for checking upstream integration site; Neae4-YeeR2 for checking downstream integration site.

EcM1SATir: The EcM1 strain carrying pACBSR (Cm<sup>R</sup>) was transformed with pGE*flu*-SATir (Km<sup>R</sup>) and cointegrants were selected on LB-Km-Cm plates. Cointegrants were resolved by I-SceI expression and individual Km sensitive colonies were checked by PCR with primer pairs: VHH-Sfi2 and VHH-Not for VHH detection; Yoe1 and NeaeR1 for checking upstream integration site; Neae4-YeeR2 for checking downstream integration site.

EcM1*lux*Δ*flu*: The EcM1 strain carrying pACBSR (Cm<sup>R</sup>) was transformed with pGE*flu* (Km<sup>R</sup>), and cointegrants were selected on LB-Km-Cm plates. Cointegrants were resolved by I-SceI expression and individual Km sensitive colonies were checked by PCR with primers Yoe1 and YeeR2 to confirm the *flu* gene deletion. Subsequently, EcM1Δ*flu* strain bearing pACBSR was transformed with pG*Emat-lux* (Km<sup>R</sup>). Cointegrants were resolved by I-SceI expression and individual Km sensitive colonies were tested for light emission. To ensure site specific integration of the *lux* operon, the bioluminescent colonies were checked by PCR primer pairs: ykgL-For and LuxC-Rev for upstream integration site and LuxE-For and yagX-Rev for downstream integration site.

EcM1luxSAgfp: The EcM1SAgfp strain carrying pACBSR (Cm<sup>R</sup>) was transformed with pGEmat-*lux* suicide plasmid (Km<sup>R</sup>). Cointegrants and individual bioluminescent colonies were selected and screened as described above for strain EcM1*lux*Δ*flu*.

EcM1luxSAtir: The EcM1SAtir strain carrying pACBSR (Cm<sup>R</sup>) was transformed with pGEmat-*lux* suicide plasmid (Km<sup>R</sup>). Cointegrants and individual bioluminescent colonies were selected and screened as described above for strain EcM1*lux*Δ*flu*.

**Supplementary Table 1. *E. coli* strains and plasmids used in this study**

| Name                                | Genotype and relevant properties                                                                                                                                                                                                                                                                      | Reference         |
|-------------------------------------|-------------------------------------------------------------------------------------------------------------------------------------------------------------------------------------------------------------------------------------------------------------------------------------------------------|-------------------|
| <b><i>E. coli</i> strains</b>       |                                                                                                                                                                                                                                                                                                       |                   |
| DH10B-T1 <sup>R</sup>               | (F- $\lambda$ -) <i>mcrA</i> $\Delta$ <i>mrr-hsdRMS-mcrBC</i> $\phi$ 80 <i>lacZDM15</i> $\Delta$ <i>lacX74</i> <i>recA1</i> <i>endA1</i> <i>araD139</i> $\Delta$ ( <i>ara</i> , <i>leu</i> )7697 <i>galU</i> <i>galK</i> <i>rpsL</i> ( <i>Str</i> <sup>R</sup> ) <i>nupG</i> <i>tonA</i>              | Novagen           |
| BW25141                             | (F- $\lambda$ -) $\Delta$ ( <i>araD-araB</i> )567, $\Delta$ <i>lacZ4787</i> (::rnnB-3), $\Delta$ ( <i>phoB-phoR</i> )580, <i>galU95</i> , $\Delta$ <i>uidA3</i> :: <i>pir</i> , <i>recA1</i> , <i>endA9</i> (del-ins):: <i>FRT</i> , <i>rph-1</i> , $\Delta$ ( <i>rhaD-rhaB</i> )568, <i>hsdR51</i> . | 6                 |
| CC118 $\lambda$ <i>pir</i>          | $\Delta$ ( <i>ara-leu</i> ) <i>araD</i> $\Delta$ <i>lacX74</i> <i>galE</i> <i>galK</i> <i>phoA20</i> <i>thi-</i> <i>rpsE</i> <i>rpoB</i> <i>argE</i> ( <i>Am</i> ) <i>recA1</i> , $\lambda$ <i>pir</i>                                                                                                | 7                 |
| MG1655                              | K-12 (F- $\lambda$ -)                                                                                                                                                                                                                                                                                 | 8                 |
| EcM1                                | MG1655 $\Delta$ <i>fimA</i> -H                                                                                                                                                                                                                                                                        | 2                 |
| EcM1SAgfp                           | EcM1 $\Delta$ <i>flu</i> :: <i>P</i> <sub>N25</sub> - <i>SAgfp</i>                                                                                                                                                                                                                                    | This work         |
| EcM1SATir                           | EcM1 $\Delta$ <i>flu</i> :: <i>P</i> <sub>N25</sub> - <i>SATir</i>                                                                                                                                                                                                                                    | This work         |
| EcM1 <i>lux</i> $\Delta$ <i>flu</i> | EcM1 $\Delta$ <i>flu</i> $\Delta$ <i>matB</i> :: <i>P</i> <sub>2</sub> - <i>luxCDABE</i>                                                                                                                                                                                                              | This work         |
| EcM1 <i>lux</i> SAgfp               | EcM1 $\Delta$ <i>flu</i> :: <i>P</i> <sub>N25</sub> - <i>SAgfp</i> $\Delta$ <i>matB</i> :: <i>P</i> <sub>2</sub> - <i>luxCDABE</i>                                                                                                                                                                    | This work         |
| EcM1 <i>lux</i> SATir               | EcM1 $\Delta$ <i>flu</i> :: <i>P</i> <sub>N25</sub> - <i>SATir</i> $\Delta$ <i>matB</i> :: <i>P</i> <sub>2</sub> - <i>luxCDABE</i>                                                                                                                                                                    | This work         |
| <b>Plasmids</b>                     |                                                                                                                                                                                                                                                                                                       |                   |
| pAK-Not                             | (Cm <sup>R</sup> ), <i>lacI</i> <sup>q</sup> - <i>Plac</i> promoter, pBR322 ori                                                                                                                                                                                                                       | 2                 |
| pNeae                               | pAK-Not-derivative; Neae polypeptide [Intimin <sub>EHEC</sub> (1-659)-E-His-tag]                                                                                                                                                                                                                      | 9                 |
| pNeae2                              | pAK-Not-derivative; Neae-myc polypeptide [Intimin <sub>EHEC</sub> (1-659)-E-His-myc-tag]                                                                                                                                                                                                              | 2                 |
| pNVgfp                              | pNeae2-derivative; VHH anti-GFP fused to Neae2 [Intimin <sub>EHEC</sub> (1-659)-E-Vgfp-myc-tag]                                                                                                                                                                                                       | 2                 |
| pNVfib                              | pNeae2-derivative; VHH anti-Fibrinogen fused to Neae2 [Intimin <sub>EHEC</sub> (1-659)-E-Vfib-myc-tag]                                                                                                                                                                                                | 1                 |
| pDisplay                            | (Amp <sup>R</sup> , G418 <sup>R</sup> ) for display of peptides on the plasma membrane of mammalian cells<br>(P <sub>CMV</sub> -IgK signal peptide-HA-polylinker-myc tag-PDGFR transmembrane domain)                                                                                                  | Life technologies |
| pDisplay-GFP-tm                     | pDisplay derivative; GFP-tm fusion (display of GFP)                                                                                                                                                                                                                                                   | 10                |
| pDisplay-TirM-tm                    | pDisplay derivative, TirM-tm fusion (display of TirM <sub>EHEC</sub> and mWasabi)                                                                                                                                                                                                                     | This work         |
| pGE                                 | (Km <sup>R</sup> ), R6K-ori, polylinker flanked by two I-SceI restriction sites.                                                                                                                                                                                                                      | This work         |
| pGE <i>flu</i>                      | pGE derivative; with homology regions flanking the <i>flu</i> gene of <i>E. coli</i> K-12                                                                                                                                                                                                             | This work         |
| pGE <i>flu</i> -SAgfp               | pGE <i>flu</i> derivative; <i>P</i> <sub>N25</sub> - <i>SAgfp</i> (constitutive expression of SA binding GFP)                                                                                                                                                                                         | This work         |
| pGE <i>flu</i> -SATir               | pGE <i>flu</i> derivative; <i>P</i> <sub>N25</sub> - <i>SATir</i> (constitutive expression of SA binding TirM).                                                                                                                                                                                       | This work         |
| pGE <i>mat-lux</i>                  | pGE derivative; <i>P</i> <sub>2</sub> - <i>luxCDABE</i> with homology regions flanking the <i>matB</i> gene of <i>E. coli</i> K-12                                                                                                                                                                    | This work         |
| pACBSR                              | (Cm <sup>R</sup> ), p15A-ori, P <sub>BAD</sub> promoter, I-SceI endonuclease, $\lambda$ Red                                                                                                                                                                                                           | 11                |

**Supplementary Table 2. Oligonucleotides used in this study**

| Name           | Sequence (5'- 3')                                                             | Use                                           |
|----------------|-------------------------------------------------------------------------------|-----------------------------------------------|
| Sfi TirM For   | GTCCTCGCAACTGCGGCCAGCCGGCCAGGCGCTTGCATTGACGCCGG                               | pDisplay-TirM-tm construction                 |
| TirM Xma Rev   | TCCCCCGGGCGAACCACCACCCGATGAAACTTTCAGCTCCTCCTG                                 | pDisplay-TirM-tm construction                 |
| PN25-Sac-Xba 1 | CTCATAAAAAATTTATTTGCTTTCAGGAAAAATTTTCTGTATAATAGATTCATAAATTTGAGAGAGGAGTTT      | PN25 promoter generation                      |
| PN25-Sac-Xba 2 | CTAGAAACTCCTCTCTCAAATTTATGAATCTATTATACAGAAAAATTTCTGAAAGCAAATAAATTTTTATGAGAGCT | PN25 promoter generation                      |
| Xho yeeP       | CCGCTCGAGATGACCGTGCCCTGTCTGTGGATG                                             | <i>flu</i> 5' Homology Region                 |
| Sac yeeP       | CCGGAGCTCTCAGAAGAAAAATCCAGTTCATACCGC                                          | <i>flu</i> 5' Homology Region                 |
| Ang43 Spe      | GACTAGTTTCCACTGCAGGCAGCGGGATGACGTTCTC                                         | <i>flu</i> 3' Homology Region                 |
| Ang43 Sph      | ACATGCATGCCAGCCAGCGAATATGGAACAACCGGTTATG                                      | <i>flu</i> 3' Homology Region                 |
| Yoe1           | CGGTTACAGGCAATTGGCGGTATTGTTAAC                                                | 5' check SAs integration in <i>flu</i>        |
| NeaeR1         | TGTTGTGCCGATAATTTAATGCCTTGTTCATC                                              | 5' check SAs integration in <i>flu</i>        |
| Neae4          | CGTAATGGCAATAGCTCTAACAATGTA                                                   | 3' check SAs integration in <i>flu</i>        |
| YeeR2          | ACATCAGTGACGGTGAAATATCGTACTGTAACG                                             | 3' check SAs integration in <i>flu</i>        |
| MatA XhoI      | CCGCTCGAGCTGAACTGATTGTGGATATCGACAG                                            | <i>mat</i> 5' Homology Region                 |
| MatA SacI      | CCGGAGCTCTGCATTTCTTCCCGAGTTGAATTGAGG                                          | <i>mat</i> 5' Homology Region                 |
| MatBC SpeI     | GACTAGTGCATCTGGAGCGCGACGTTAGCGTAC                                             | <i>mat</i> 3' Homology Region                 |
| MatBC SphI     | ACATGCATGCCACAGCGCTGCGGTTGGCATTATCG                                           | <i>mat</i> 3' Homology Region                 |
| YkgL For       | ACTCAGTCTCCTCCCTTTGCG                                                         | 5' check <i>lux</i> integration in <i>mat</i> |
| LuxC Rev       | TGCCAACAGATGTACAGATTTACC                                                      | 5' check <i>lux</i> integration in <i>mat</i> |
| LuxE For       | TATATCATAACCGGAGGCGGCTGG                                                      | 3' check <i>lux</i> integration in <i>mat</i> |
| YagX Rev       | ACTTATGTCAGCAGCGCTGGC                                                         | 3' check <i>lux</i> integration in <i>mat</i> |
| VHH Sfi2       | GTCCTCGCAACTGCGGCCAGCCGGCCATGGCTCAGGTGCAGCTGGTGA                              | Check integration SAs                         |
| VHH Not        | GGACTAGTGCGGCCGCTGAGGAGACGGTGACCTGGGT                                         | Check integration SAs                         |
| R6K1           | TCCCCCGGGTAGGGATAACAGGGTAATCCATGTCAGCCGTTAAGTGTTCTGTGTC                       | pGE vector construction                       |
| R6K2           | TTGGCGCGCCGATCTGAAGATCAGCAGTTCAACC                                            | pGE vector construction                       |
| Km1            | TTGGCGCGCCGACGTCTGTGTCTCAAAATCTCTG                                            | pGE vector construction                       |
| Km2            | TCCCCCGGGATTACCCTGTTATCCCTATTATTAGAAAAATTCATCCAGCATCAG                        | pGE vector construction                       |
| MCS1           | CCGTCTCGAGACGCGTGAGCTCCATATGTCTAGAGCTAGCAAGCTTACTAGTCTAGGGCATGCA              | pGE vector construction                       |
| MCS2           | CCGGTGCATGCCCTAGGACTAGTAAGCTTGTAGCTCTAGACATATGGAGCTCACGCTCTCGAGA              | pGE vector construction                       |

## References of Supplemental Information

- [1] Campuzano, S., Salema, V., Moreno-Guzmán, M., Gamella, M., Yáñez-Sedeño, P., Fernández, L. A., and Pingarrón, J. M. (2014) Disposable amperometric magnetoimmunosensors using nanobodies as biorecognition element. Determination of fibrinogen in plasma, *Biosensors and Bioelectronics* 52, 255-260.
- [2] Salema, V., Marín, E., Martínez-Arteaga, R., Ruano-Gallego, D., Fraile, S., Margolles, Y., Teira, X., Gutierrez, C., Bodelón, G., and Fernández, L. Á. (2013) Selection of single domain antibodies from immune libraries displayed on the surface of *E. coli* cells with two  $\beta$ -domains of opposite topologies, *PLoS ONE* 8, e75126.
- [3] Martínez-García, E., and de Lorenzo, V. (2011) Engineering multiple genomic deletions in Gram-negative bacteria: analysis of the multi-resistant antibiotic profile of *Pseudomonas putida* KT2440, *Environ Microbiol* 13, 2702-2716.
- [4] Silva-Rocha, R., Martínez-García, E., Calles, B., Chavarria, M., Arce-Rodríguez, A., de Las Heras, A., Paez-Espino, A. D., Durante-Rodríguez, G., Kim, J., Nickel, P. I., Platero, R., and de Lorenzo, V. (2013) The Standard European Vector Architecture (SEVA): a coherent platform for the analysis and deployment of complex prokaryotic phenotypes, *Nucleic Acids Res* 41, D666-675.
- [5] Brunner, M., and Bujard, H. (1987) Promoter recognition and promoter strength in the *Escherichia coli* system, *EMBO J* 6, 3139-3144.
- [6] Datsenko, K. A., and Wanner, B. L. (2000) One-step inactivation of chromosomal genes in *Escherichia coli* K-12 using PCR products, *Proc Natl Acad Sci U S A* 97, 6640-6645.
- [7] Herrero, M., de Lorenzo, V., and Timmis, K. N. (1990) Transposon vectors containing non-antibiotic resistance selection markers for cloning and stable chromosomal insertion of foreign genes in gram-negative bacteria, *J Bacteriol* 172, 6557-6567.
- [8] Blattner, F. R., Plunkett, G., 3rd, Bloch, C. A., Perna, N. T., Burland, V., Riley, M., Collado-Vides, J., Glasner, J. D., Rode, C. K., Mayhew, G. F., Gregor, J., Davis, N. W., Kirkpatrick, H. A., Goeden, M. A., Rose, D. J., Mau, B., and Shao, Y. (1997) The complete genome sequence of *Escherichia coli* K-12, *Science* 277, 1453-1474.
- [9] Bodelón, G., Marín, E., and Fernández, L. A. (2009) Role of periplasmic chaperones and BamA (YaeT/Omp85) in folding and secretion of Intimin from enteropathogenic *Escherichia coli* strains, *J. Bacteriol.* 191, 5169-5179.
- [10] Han, H. J., Park, S. G., Kim, S. H., Hwang, S. Y., Han, J., Traicoff, J., Kho, W. G., and Chung, J. Y. (2004) Epidermal growth factor-like motifs 1 and 2 of *Plasmodium vivax* merozoite surface protein 1 are critical domains in erythrocyte invasion, *Biochem Biophys Res Commun* 320, 563-570.
- [11] Herring, C. D., Glasner, J. D., and Blattner, F. R. (2003) Gene replacement without selection: regulated suppression of amber mutations in *Escherichia coli*, *Gene* 311, 153-163.



## Supplementary Figures

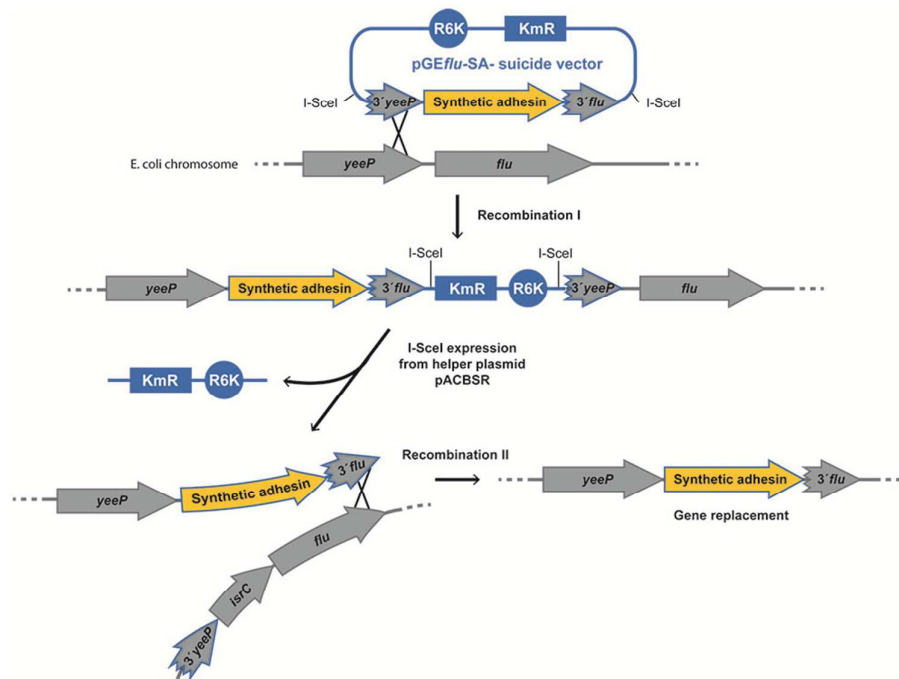

**Figure S1. Site-specific integration of synthetic adhesin gene in the chromosome of *E. coli*.** Scheme showing the integration of a synthetic adhesin gene in the *flu* locus of *E. coli* K-12 chromosome. Integration is done using a *pGE<sub>flu</sub>-SA* suicide plasmid containing the pi-dependent *R6K* origin of replication, a kanamycin resistance gene (*Km<sup>R</sup>*) and a synthetic adhesin gene cassette of the desired specificity under the control of the *P<sub>N25</sub>* constitutive promoter. The SA gene cassette is flanked by two homology regions (HRs), corresponding to the 3'-ends of the *yeeP* and *flu* genes, and two *I-SceI* restriction sites. Homologous recombination of the suicide plasmid with the chromosome (Recombination I) leads to a *Km<sup>R</sup>*-cointegrant that is later resolved by the expression of *I-SceI* endonuclease from the helper plasmid *pACBSR*. The double strand breaks generated by *I-SceI* cleavage are repaired by a second homologous recombination (Recombination II) that could revert the cointegrant to the wild type situation or lead to the chromosomal integration of the SA-gene cassette replacing the *flu* gene (as depicted).

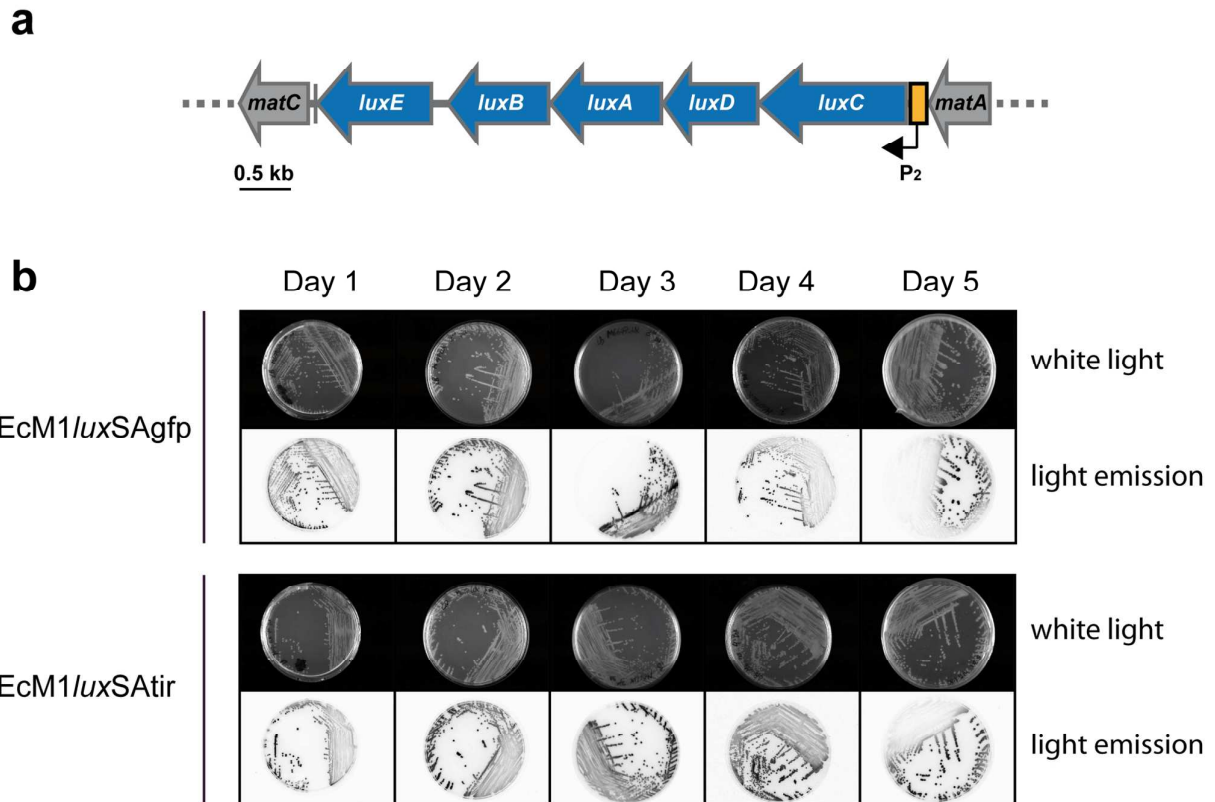

**Figure S2. Bioluminescence of engineered *E. coli* strains expressing synthetic adhesins.** (a) Scheme showing the *luxCDABE* operon under the control of the P2 constitutive promoter inserted in the chromosome of engineered *E. coli* strains replacing the *matB* gene. (b) Stability of the bioluminescence from EcM1*luxSAgfp* and EcM1*luxSATir* strains grown in liquid LB at 37 °C for the indicated days, with a daily dilution (1:2000) with fresh LB medium. A sample of these cultures from each day was streaked on LB agar plates and white light and light emission images from the plates were acquired. All individual colonies in the plates show strong bioluminescence.

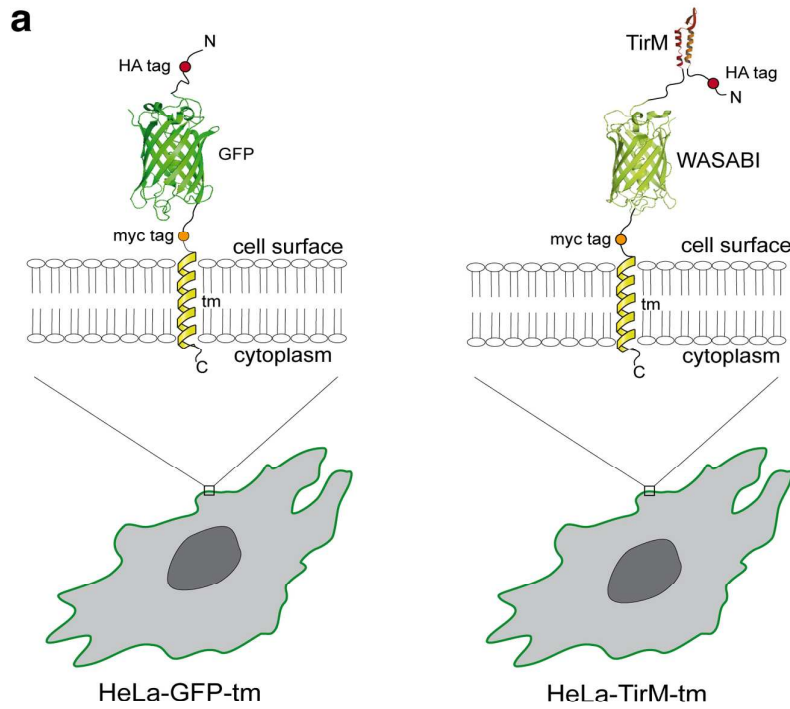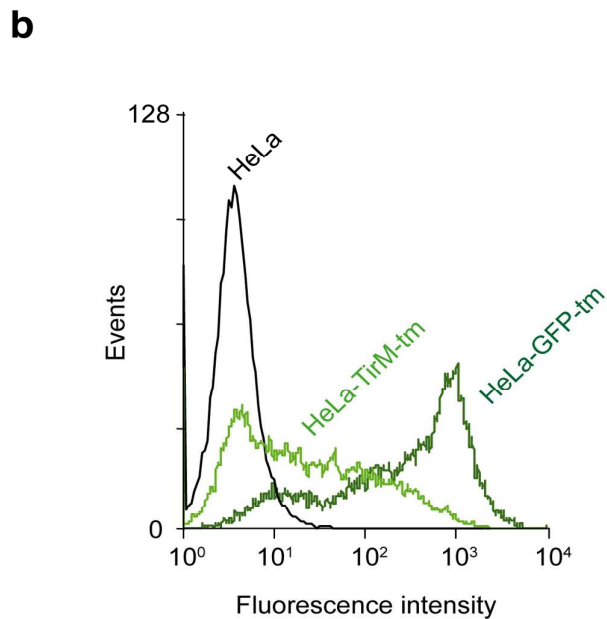

**Figure S3. HeLa-GFP-tm and HeLa-TirM-tm cells.** (a) Model showing GFP-tm and TirM-tm protein fusions in the plasma membrane of stably transfected HeLa-GFP-tm and HeLa-TirM-tm cells, respectively. The transmembrane domain (tm) from the platelet derived growth factor receptor (PDGFR) anchors the fusion proteins in the plasma membrane, displaying on the cell surface GFP or mWasabi-TirM protein domains. (b) Flow cytometry analysis of HeLa-GFP-tm and HeLa-TirM-tm cells showing fluorescence levels corresponding to the expression of protein fusions GFP-tm and TirM-tm by these cell populations. Untransfected HeLa cells were used as a negative control.

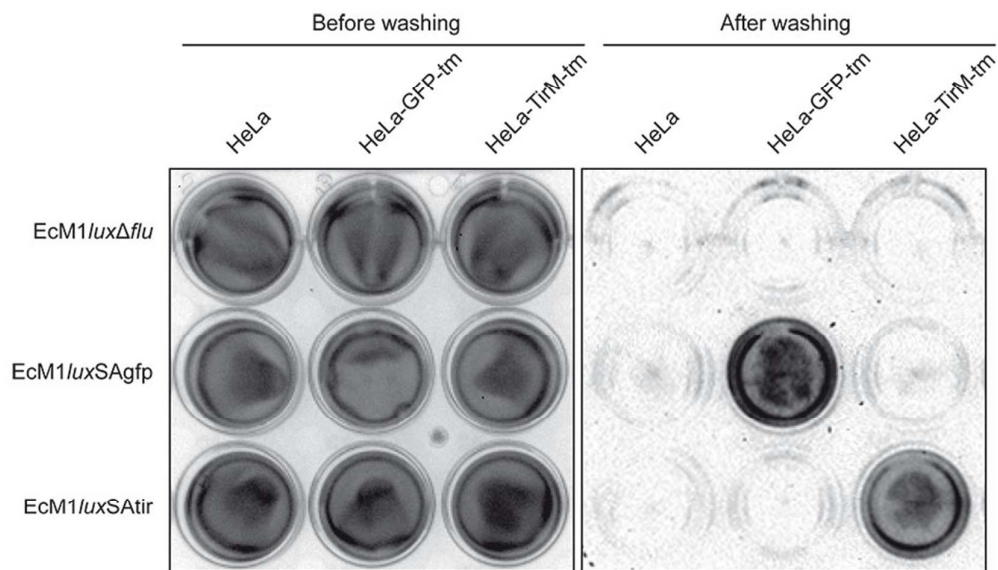

**Figure S4. Bioluminescence assay testing the adhesion of engineered *E. coli* to target mammalian cells.** HeLa, HeLa-GFP-tm and HeLa-TirM-tm cells were grown in a tissue culture plate and infected with EcM1*lux* $\Delta$ *flu*, EcM1*lux*SAgfp and EcM1*lux*SAtir as indicated. After 1 h infection, the plate was monitored for light emission before (left) and after (right) washing of unbound bacteria with PBS, revealing positive bioluminescence signals when the engineered bacterial strains with a SAs infects its target cell.

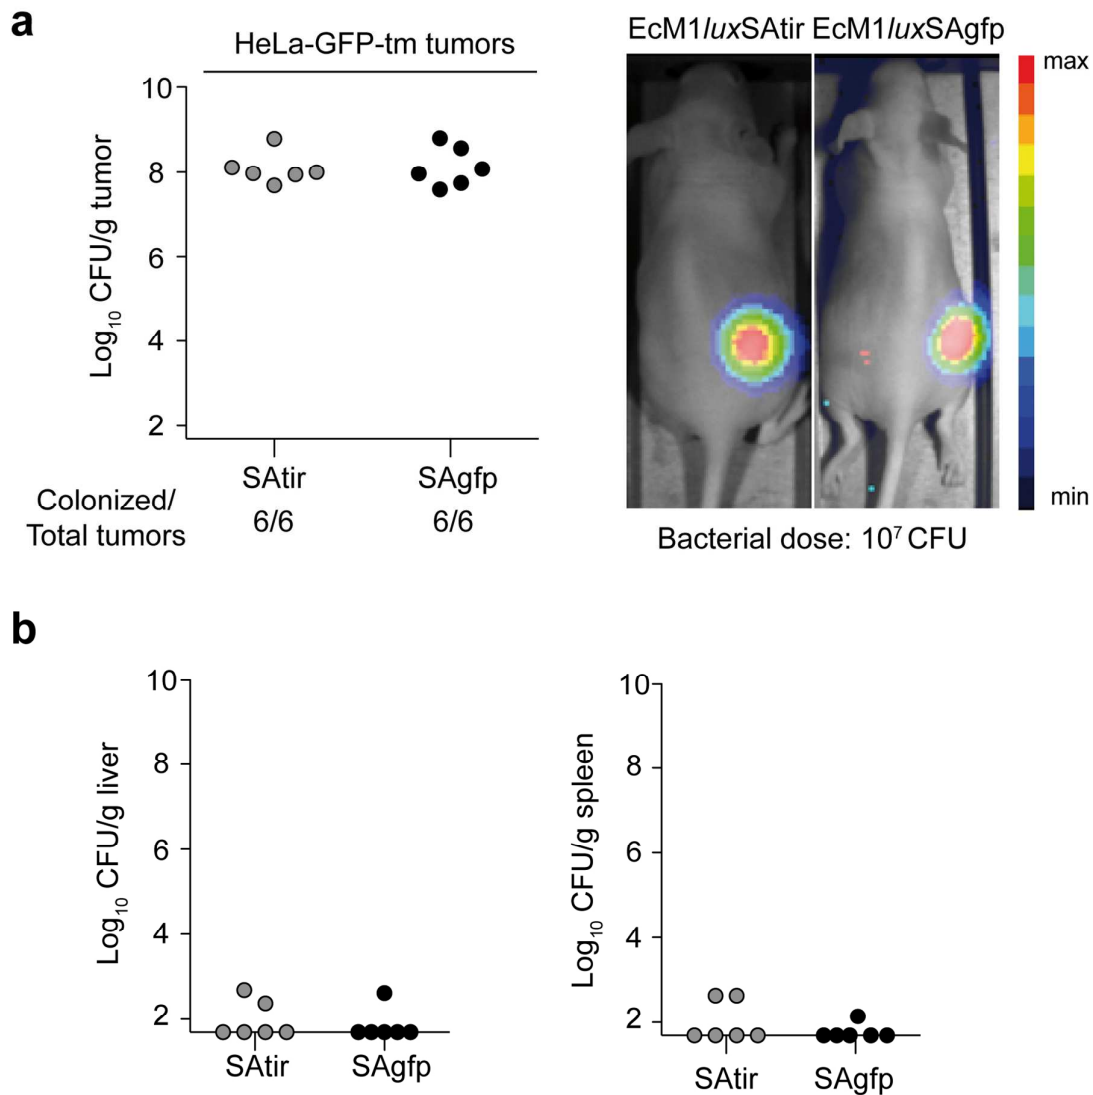

**Figure S5. *In vivo* colonization of tumors with high doses of *E. coli* expressing synthetic adhesins.** (a) Bacterial colonization of HeLa-GFP-tm solid tumors by EcM1*lux*SATir (SATir) and EcM1*lux*SAgfp (SAgfp), as indicated, after their intravenous administration with a dose of  $1 \times 10^7$  CFU/mouse. Infected tumor-bearing mice (experimental groups  $n=6$ ) were euthanized 4-days post-administration and the number of CFU in each tumor was determined. Each circle represents the CFU determined per gram of tumor ( $\text{Log}_{10}$  CFU/g) for each animal in the different experimental groups. The ratio of colonized tumors in each group is shown at the bottom. On the right, bioluminescence live imaging of HeLa-GFP-tm tumor-bearing mouse infected with  $1 \times 10^7$  CFU of EcM1*lux*SATir (left image) or EcM1*lux*SAgfp (right image). Images are overlays of photographic white-light and bioluminescence signals from a representative tumor-bearing mouse infected with each strain, as indicated on top. The intensities of the bioluminescence signals are represented in pseudocolor according to the scale bar. (b) Graphs showing bacterial titers in livers (left) and spleens (right) from those animals with a HeLa-GFP-tm tumor colonized in A by EcM1*lux*SATir (SATir) or EcM1*lux*SAgfp (SAgfp) strains. Each circle in the graph represents the CFU determined per gram of tissue ( $\text{Log}_{10}$  CFU/g).

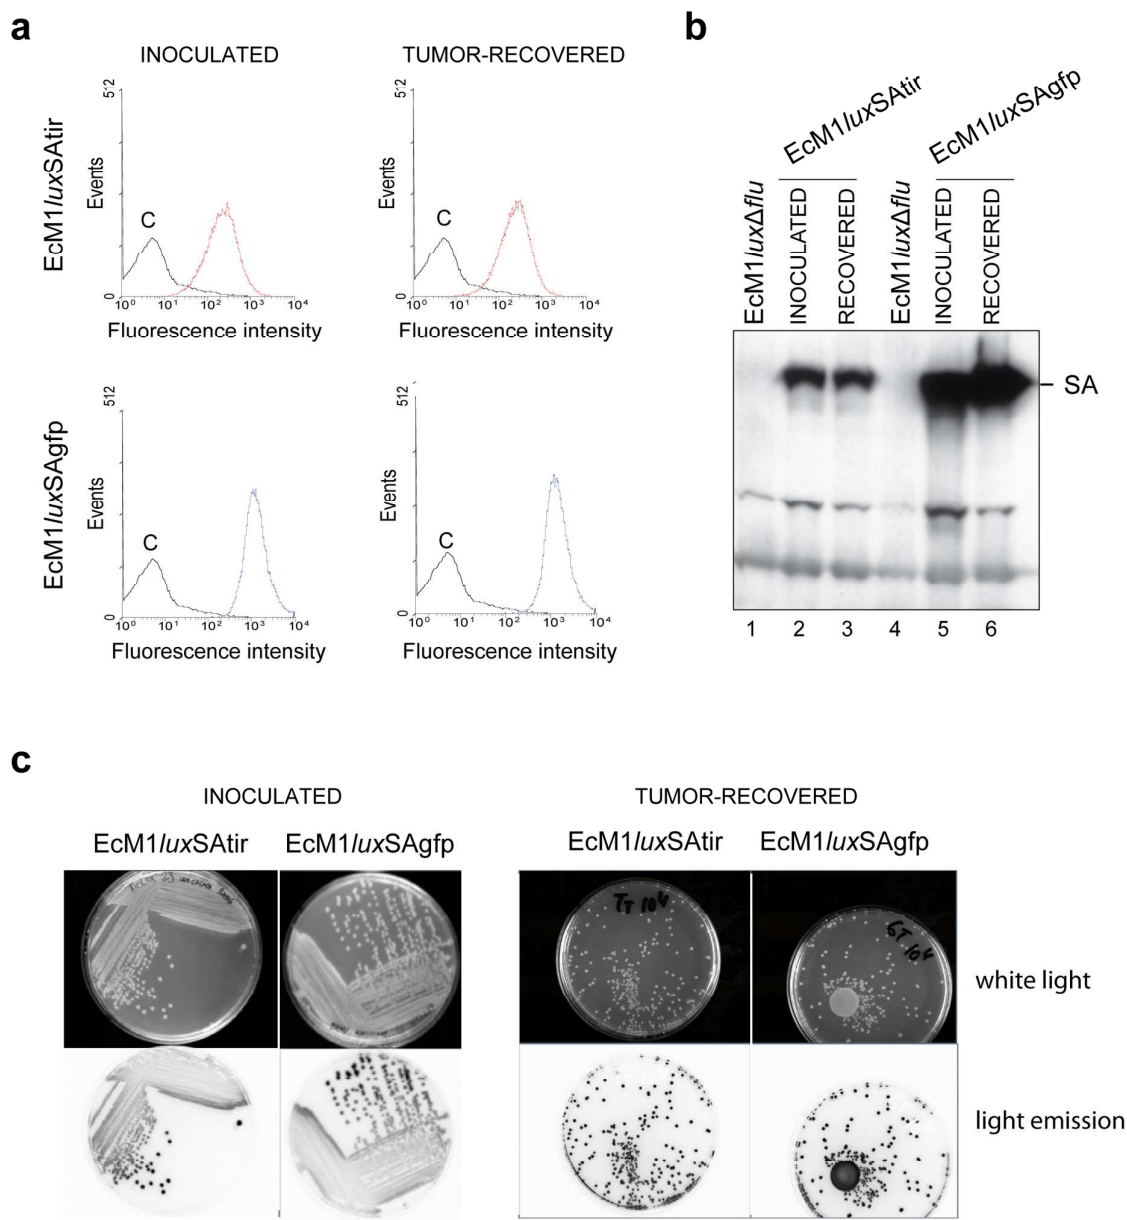

**Figure S6. Expression of synthetic adhesins and bioluminescence in engineered *E. coli* recovered from colonized tumors.** (a) The expression of SAs in the inoculated and tumor-recovered bacteria from strains EcM1luxSATir and EcM1luxSAgfp, as indicated, was analyzed by flow cytometry. Bacteria were recovered 4-days post-infection from colonized tumors as in Figure S5. Bacteria in flow cytometry were stained with anti-myc mAb and secondary anti-mouse IgG-Alexa 488. Control strain (C, black line) was EcM1luxΔflu. (b) The expression of SAs in the inoculated and tumor-recovered bacteria from strains EcM1luxSATir and EcM1luxSAgfp, as indicated, was analyzed by Western blot. The SA protein fusions were detected with anti-myc mAb and anti-mouse IgG-POD conjugate. (c) Analysis of bioluminescence of inoculated and tumor-recovered EcM1luxSAgfp or EcM1luxSATir bacteria grown in LB agar plates at 37°C. Images of white light and light emission from the plates were acquired. All individual colonies show strong bioluminescence.

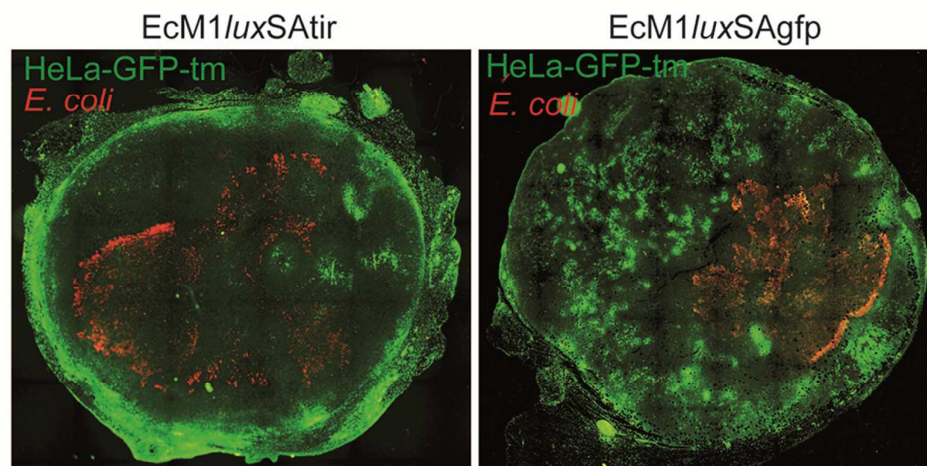

**Figure S7. Bacterial distribution in solid HeLa-GFP-tm tumors.** Histological cross-sections of colonized HeLa-GFP-tm solid tumors four days post-infection with  $\sim 1 \times 10^7$  CFU of EcM1*luxSATir* or EcM1*luxSAgfp* strains per mouse, as indicated. Bacteria were stained with anti-*E. coli* polyclonal antibodies and anti-rabbit-Alexa-594 antibodies (red). The green color corresponds to the fluorescence of GFP in HeLa-GFP-tm cells.
